# Supplementary material for: Corynebacterium glutamicum as an Efficient Omnivorous Microbial Host for the Bioconversion of Lignocellulosic Biomass
Source: PubMed Central journal article supplement (PMC9011048; doi:10.3389/fbioe.2022.827386), 2022-04-01
Supplement: DataSheet1.pdf [file DataSheet1.pdf]

## Supplementary information

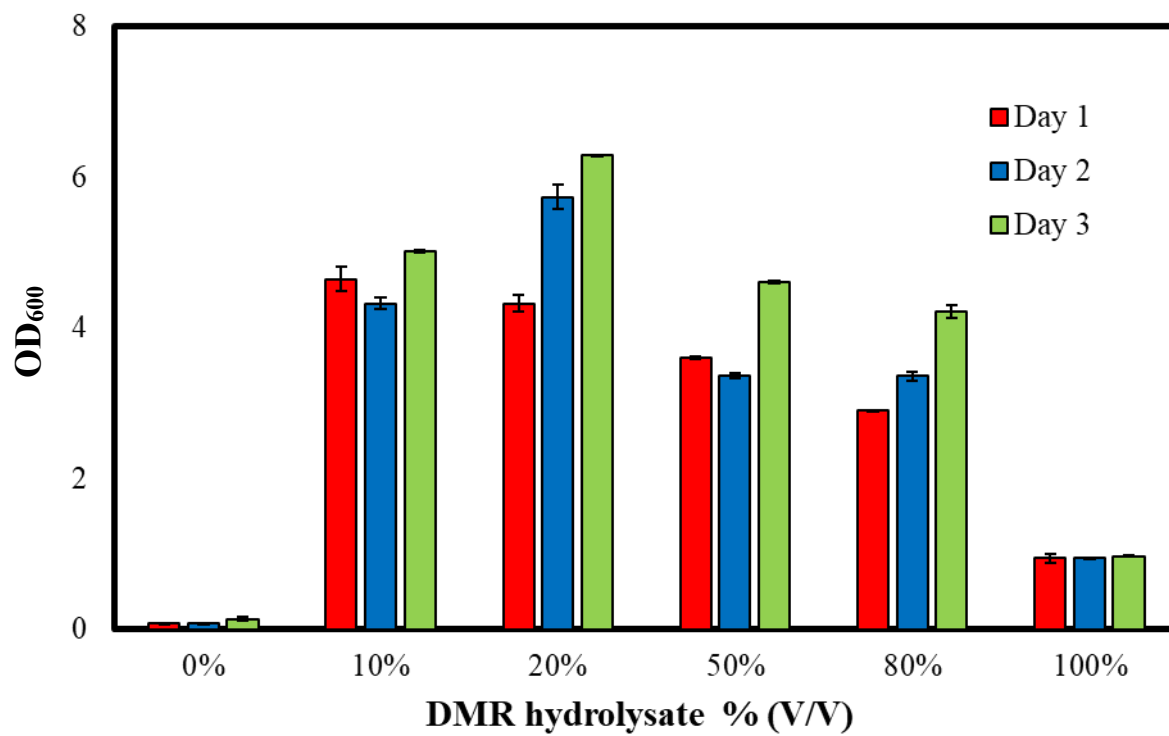

**Figure S1:** Effect of varying DMR hydrolysate concentrations on the growth (Data represents mean  $\pm$  SD, n=3) of the *C. glutamicum* strain ATCC 13032.

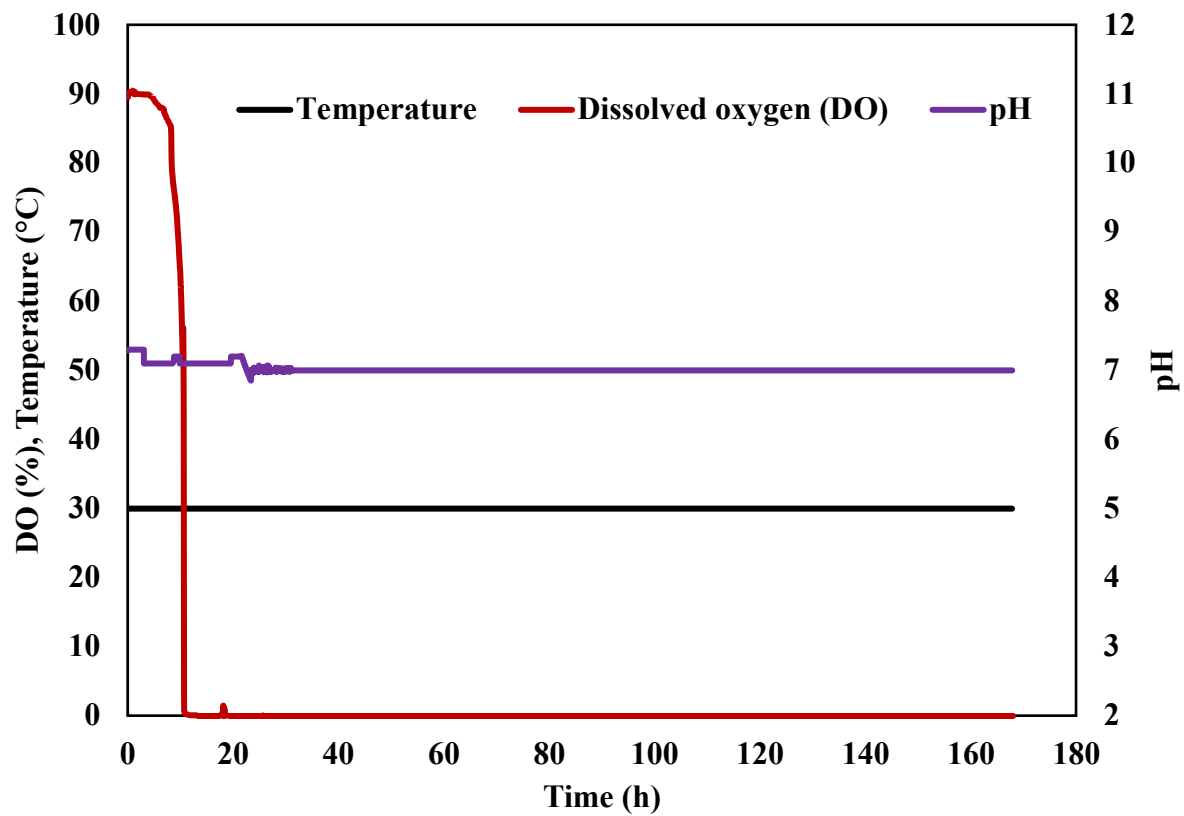

**Figure S2:** Variations in dissolved oxygen, temperature, and pH with time in a bioreactor during anaerobic fermentation.

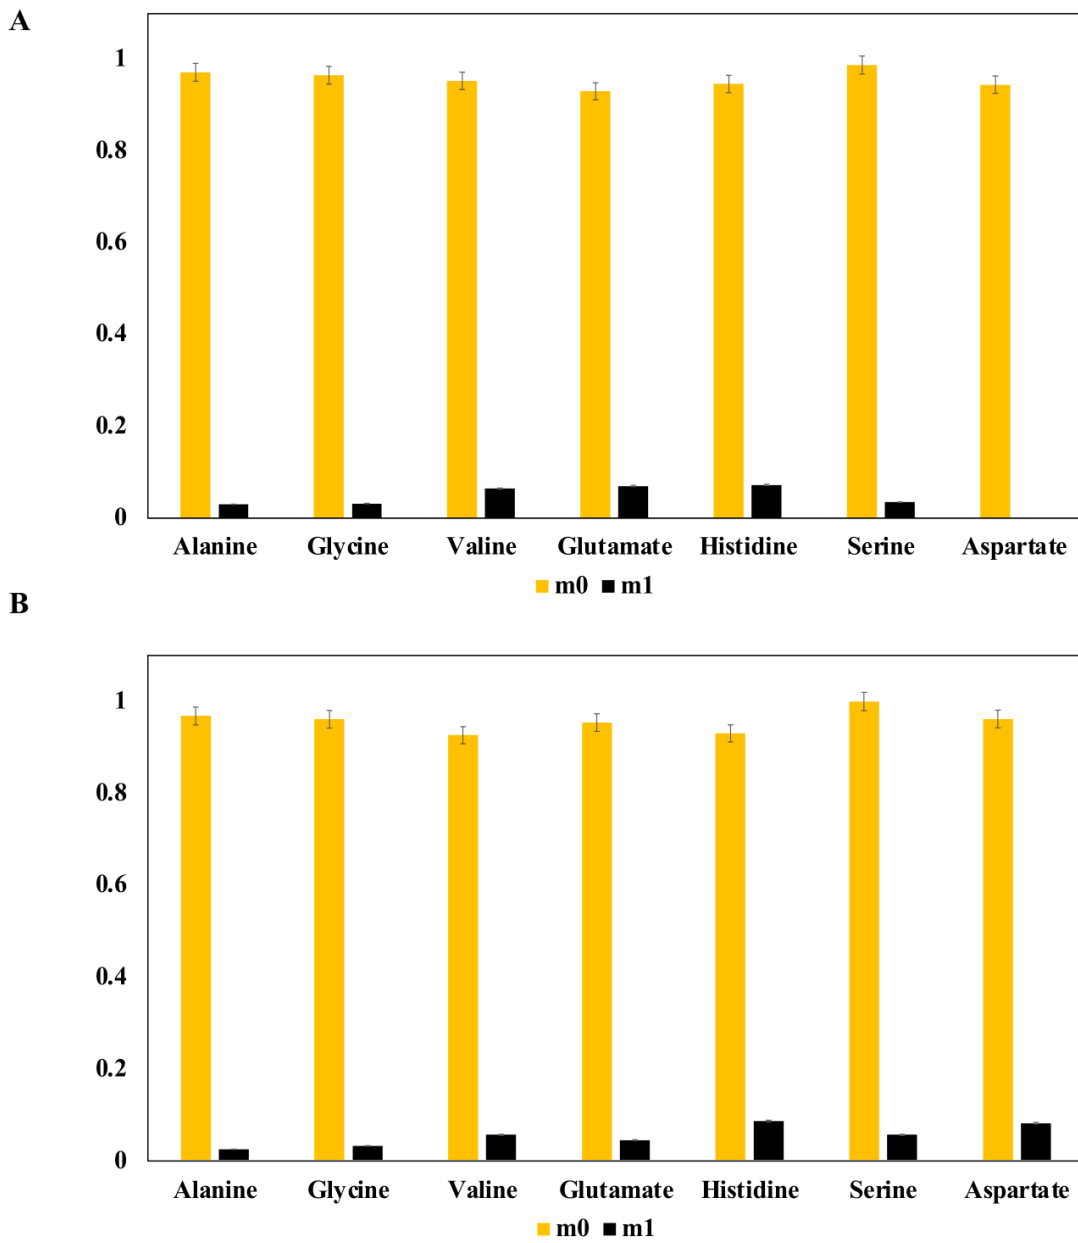

**Figure S3:** Mass distribution of amino acids for *C. glutamicum* grown in (A): [U-<sup>13</sup>C] xylose in BTM2 media supplemented with BHI; B) BTM2 media supplemented with BHI but no extra sugars. Error bars indicate 2% technical error of instrument.
